# Supplementary material
Source: PubMed Central journal article supplement (PMC5563573)

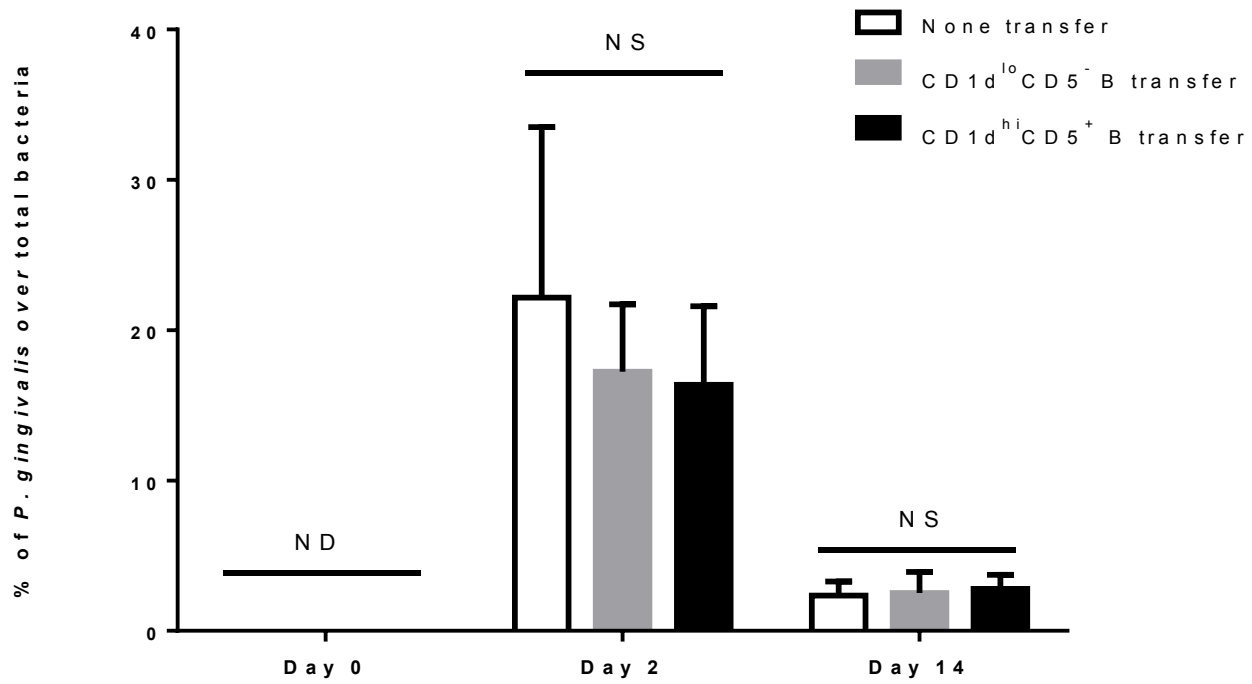

Figure.S1

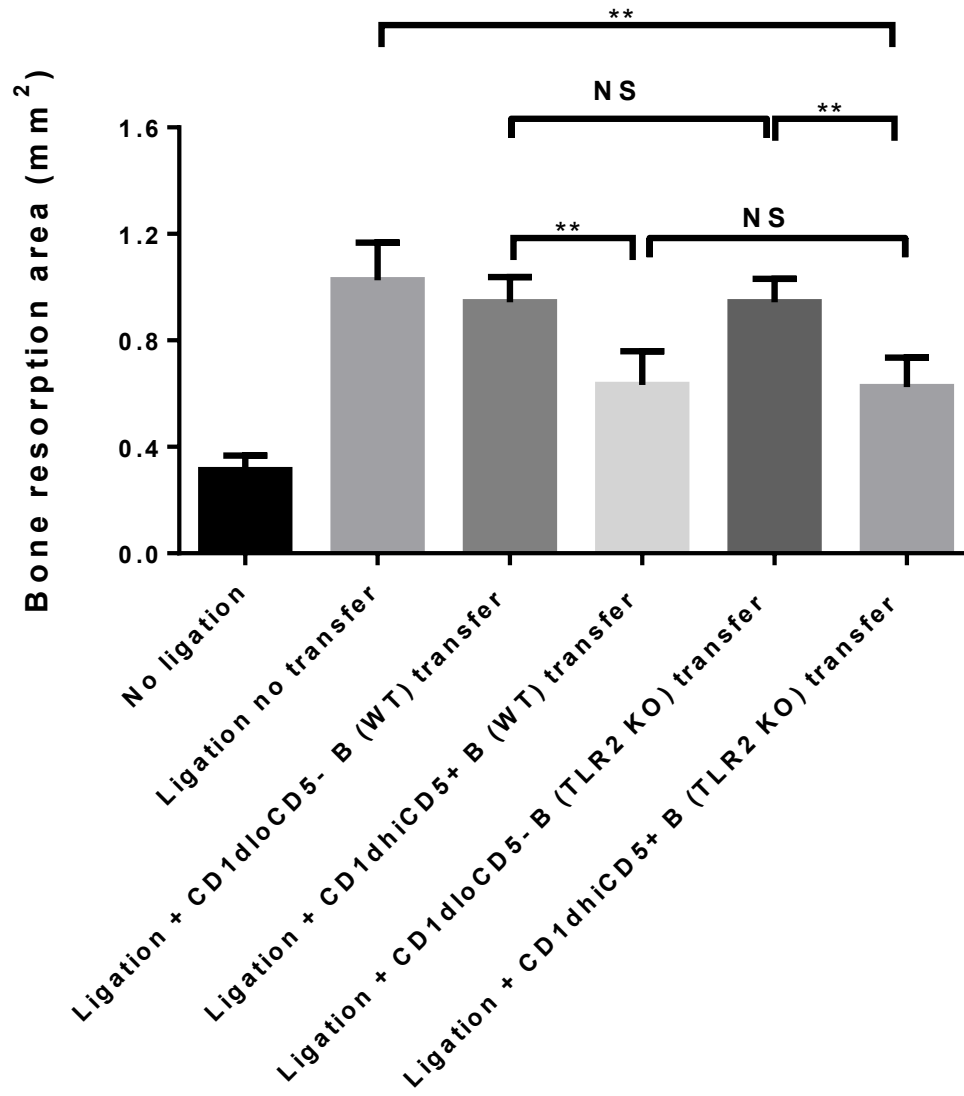

Figure.S2

**a**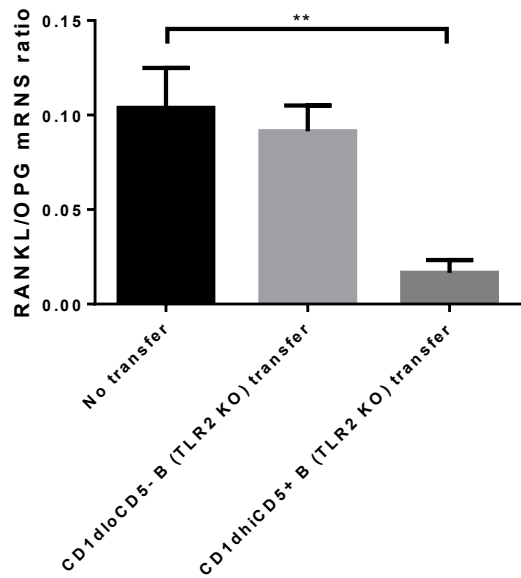**b**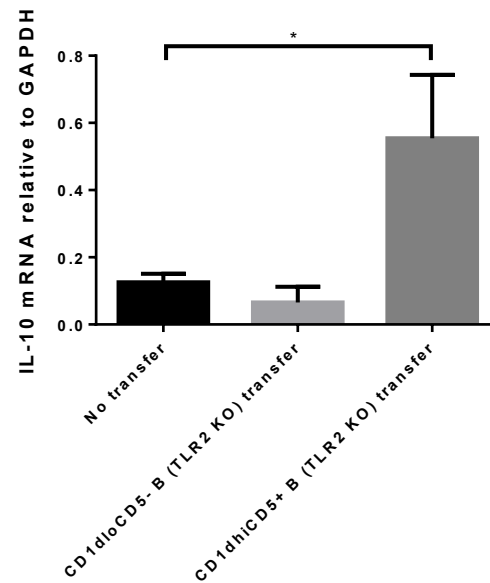**c**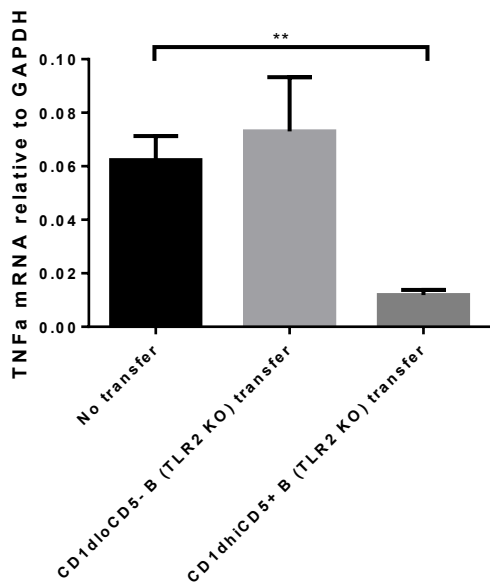**d**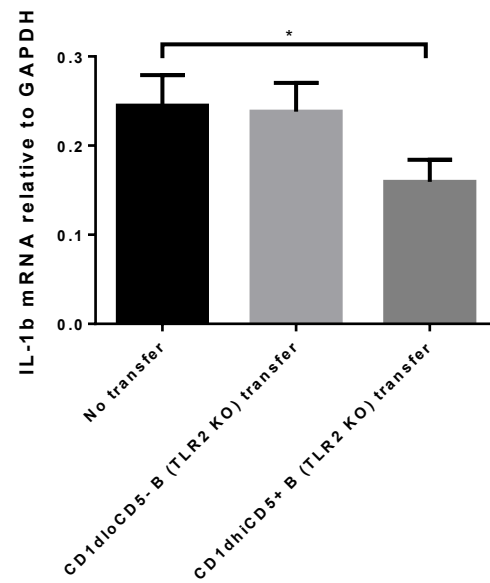

Supplement: IAI.00335-17_zii999092132s1.pdf [file IAI.00335-17_zii999092132s1.pdf]
